# Supplementary material for: Food insecurity and other barriers to adherence to a gluten-free diet in individuals with coeliac disease and non-coeliac gluten sensitivity in the Netherlands: a mixed-methods study
Source: HighWire-hosted journal article supplement (doi:10.1136/bmjopen-2024-088069), 2024-10-01
Supplement: bmjopen-2024-088069supp002_data_supplement.pdf [file bmjopen-2024-088069supp002_data_supplement.pdf]

**Additional document 2 – Interview guide translated to English**

| Subject                       | Sample question                                                                                                                                                                                                                                                                          |
|-------------------------------|------------------------------------------------------------------------------------------------------------------------------------------------------------------------------------------------------------------------------------------------------------------------------------------|
| General/introduction          |                                                                                                                                                                                                                                                                                          |
| Celiac disease/NCGS           | What is your reason for following a gluten-free diet? (celiac disease, non-celiac gluten sensitivity)                                                                                                                                                                                    |
| Households                    | What does your household look like?<br>Do others in your household also have celiac disease/NSGS?                                                                                                                                                                                        |
| Gluten free diet              | How long have you been following a gluten-free diet?                                                                                                                                                                                                                                     |
| Specific topics               |                                                                                                                                                                                                                                                                                          |
| Gluten-free diet experiences  | How do you experience following a gluten-free diet?<br>What do you find easy about following a gluten-free diet?<br>What do you find difficult about following a gluten-free diet?                                                                                                       |
| Range of gluten-free products | What do you think of the range of gluten-free products? (in supermarket, in restaurants)<br>What is your experience of physical access to gluten-free products?                                                                                                                          |
| Costs/affordability           | What do you think of the costs of gluten-free products?<br>How do you deal with the costs of gluten-free products?<br>What role does money play in what you eat or buy?<br>How much money per month do you spent on gluten-free products?                                                |
| Social                        | What does gluten-free eating look like in your household?<br>What is your experience of gluten-free food at social occasions, such as drinks or parties?<br>What is your experience of gluten-free eating on holiday?<br>How do you handle your gluten-free diet on occasions like this? |
| Health                        | What does it mean to you to eat healthy?<br>What can you tell me about healthy eating and the gluten-free diet?                                                                                                                                                                          |
| Financial status              | How would you describe your financial status?<br>How does your financial status affect following a gluten-free diet?<br>What do you think of the tax return for dietary costs?                                                                                                           |
| Mental well-being             | How would you describe your state of mind, for example stress level?<br>What can you tell me about following a gluten-free diet and your state of mind?                                                                                                                                  |
| Non gluten-free foods         | Are there times when you feel compelled to eat gluten / not eat completely gluten-free? (e.g. because of costs)<br>What are the reasons for this?                                                                                                                                        |
| Help                          | What would help you adhere to a gluten-free diet?                                                                                                                                                                                                                                        |
| Closing                       |                                                                                                                                                                                                                                                                                          |
| Other topics                  | Is there anything else you would like to discuss during this interview?                                                                                                                                                                                                                  |
