# Supplementary material for: Food insecurity and other barriers to adherence to a gluten-free diet in individuals with coeliac disease and non-coeliac gluten sensitivity in the Netherlands: a mixed-methods study
Source: HighWire-hosted journal article supplement (doi:10.1136/bmjopen-2024-088069), 2024-10-01
Supplement: bmjopen-2024-088069supp004_data_supplement.pdf [file bmjopen-2024-088069supp004_data_supplement.pdf]

Supplementary table 1 Diet quality score calculation

| Dietary component          | Dietary recommendations by the Dutch Health Council and/or the Netherlands Nutrition Centre                    | % contribution to the dietary component score | Units | Dietary component score                                                                                                                    |                                                                                                    |                                                                    |
|----------------------------|----------------------------------------------------------------------------------------------------------------|-----------------------------------------------|-------|--------------------------------------------------------------------------------------------------------------------------------------------|----------------------------------------------------------------------------------------------------|--------------------------------------------------------------------|
|                            |                                                                                                                |                                               |       | MINIMUM SCORE (=0 POINTS)                                                                                                                  | 5 POINTS                                                                                           | MAXIMUM SCORE (=10 POINTS)                                         |
| Vegetables                 | Consume at least 200 grams of vegetables daily                                                                 | 100                                           | g/d   | 0                                                                                                                                          | Continuous                                                                                         | ≥200                                                               |
| Fruit                      | Consume at least 200 grams of fruit daily                                                                      | 100                                           | p/d   | 0                                                                                                                                          | Continuous                                                                                         | ≥2                                                                 |
| Legumes                    | Consume one serving legumes a week                                                                             | 100                                           | g/w   | 0                                                                                                                                          | Continuous                                                                                         | ≥135                                                               |
| Unsalted nuts              | Consume at least 15 grams of unsalted nuts daily                                                               | 100                                           | g/d   | 0                                                                                                                                          | Continuous                                                                                         | ≥15                                                                |
| Fish                       | Consume one serving of fish weekly, preferably fatty fish                                                      | 50                                            | s/w   | 0                                                                                                                                          | Continuous                                                                                         | ≥1                                                                 |
|                            |                                                                                                                | 50                                            | -     | No fish consumed                                                                                                                           | Lean or both lean and fatty fish                                                                   | Mostly fatty fish                                                  |
| Grain products             | Consume at least 90 grams of whole grain products daily                                                        | 50                                            | g/d   | 0                                                                                                                                          | Continuous                                                                                         | ≥90                                                                |
|                            | Replace refined grain products by whole grain products                                                         | 50                                            | -     | Mostly refined                                                                                                                             | Both refined and whole grain                                                                       | Mostly whole grain                                                 |
| Dairy                      | Consume 2-3 servings of dairy daily, preferably (semi-) skimmed dairy                                          | 50                                            | s/d   | 0                                                                                                                                          | Continuous                                                                                         | ≥2                                                                 |
|                            |                                                                                                                | 50                                            | -     | Full fat dairy products                                                                                                                    | Both whole dairy and (semi-) skimmed dairy products                                                | (Semi-) skimmed dairy products                                     |
| Tea                        | Consume 3-4 cups of green/black tea a day                                                                      | 100                                           | s/d   | <1 <b>AND</b> mostly green/black tea<br><br><3 <b>AND</b> both herbal tea and green/black tea<br><br>Mostly herbal tea<br><br>Not consumed | 1 to 2 <b>AND</b> mostly green/black tea<br><br>≥ 3 <b>AND</b> both herbal tea and green/black tea | ≥ 3 <b>AND</b> mostly green/black tea                              |
| Coffee                     | Replace unfiltered coffee with filtered coffee                                                                 | 100                                           | -     | Boiled coffee, cafetière coffee, Greek coffee, Turkish coffee                                                                              | Vending-machine coffee <sup>2</sup> , coffee from cups and espresso                                | Not consumed or filter coffee, coffee from pads and instant coffee |
| Oils and fats              | Replace butter, hard margarines and cooking fats with soft margarines, liquid cooking fats, and vegetable oils | 50                                            | -     | Butter or hard margarines                                                                                                                  | Both butter/hard margarines and oils/soft margarines                                               | Oils or soft margarines                                            |
|                            |                                                                                                                | 50                                            | -     | Butter on bread or bread is not buttered at all                                                                                            | Semi-skimmed butter or hard margarine on bread                                                     | Diet margarine on bread                                            |
| Sugar containing beverages | Minimize consumption of sugar-containing beverages.                                                            | 100                                           | s/d   | ≥ 1                                                                                                                                        | <1                                                                                                 | 0                                                                  |

|               |                                                                                                                                                                                                    |     |            |          |            |   |
|---------------|----------------------------------------------------------------------------------------------------------------------------------------------------------------------------------------------------|-----|------------|----------|------------|---|
| Savory snacks | For products outside the Wheel of Five: consume an item from the daily selection no more than three to five times per day, and something from the weekly selection no more than three times a week | 50  | lrg<br>s/w | $\geq 3$ | Continuous | 0 |
|               |                                                                                                                                                                                                    | 50  | sml<br>s/d | $\geq 3$ | Continuous | 0 |
| Sweet snacks  | For products outside the Wheel of Five: consume an item from the daily selection no more than three to five times per day, and something from the weekly selection no more than three times a week | 100 | s/w        | $\geq 3$ | Continuous | 0 |

g = grams; p = pieces; s = servings; d = day; w = week; lrg = large; sml = small
