# Supplementary material for: Food insecurity and other barriers to adherence to a gluten-free diet in individuals with coeliac disease and non-coeliac gluten sensitivity in the Netherlands: a mixed-methods study
Source: HighWire-hosted journal article supplement (doi:10.1136/bmjopen-2024-088069), 2024-10-01
Supplement: bmjopen-2024-088069supp005_data_supplement.pdf [file bmjopen-2024-088069supp005_data_supplement.pdf]

**Supplementary table 2** *Total food secure and food insecure participants and food security status in three categories*

| Food security status   | n (%)       |
|------------------------|-------------|
| Food secure (total)    | 417 (76,8%) |
| Food insecure (total)  | 127 (23,2%) |
| Low food security      | 70 (12,8%)  |
| Very low food security | 57 (10,4%)  |
