# Supplementary material for: Food insecurity and other barriers to adherence to a gluten-free diet in individuals with coeliac disease and non-coeliac gluten sensitivity in the Netherlands: a mixed-methods study
Source: HighWire-hosted journal article supplement (doi:10.1136/bmjopen-2024-088069), 2024-10-01
Supplement: bmjopen-2024-088069supp006_data_supplement.pdf [file bmjopen-2024-088069supp006_data_supplement.pdf]

**Supplementary table 3** Themes and subthemes associated with perceived barriers to adhering to a GF diet in food insecure individuals with CeD and NCGS (n=8)

| Main theme           | Corresponding subthemes                                       |
|----------------------|---------------------------------------------------------------|
| Resources            | Costs<br>Time<br>Online resources                             |
| Social circumstances | Restaurants<br>With friends<br>Travel<br>At home              |
| Gluten-free products | Availability<br>Reliability<br>Quality<br>Labeling            |
| Mental wellbeing     | Personal emotions<br>Social emotions<br>Mental load<br>Coping |
